# Supplementary material for: Impact of iron nitride-encapsulated bimetallic nickel molybdenum nitride on water-splitting efficiency in alkaline electrolytes
Source: Royal Society of Chemistry journal article supplement (doi:10.1039/d4ta01117a), 2024-01-01
Supplement: d4ta01117a1.pdf [file d4ta01117a1.pdf]

**Impact of Iron-Nitride-encapsulated Bimetallic Nickel Molybdenum  
Nitrides on Water-Splitting Efficiency in Alkaline Electrolytes**

**Venkatesan Jayaraman, Ganghyun Jang, Gi-Hyeok Noh, Manasi Murmu, Do-Heyoung  
Kim\***

*School of Chemical Engineering, Chonnam National University, 77 Yongbong-ro, Gwangju  
61186, Republic of Korea*

**Keywords:** Interstitial nitride; Interface modulation; Water splitting; Active site, Electrolyte  
diffusion

**\*Corresponding author**

**Prof. Do-Heyoung Kim**

E-Mail: [kdhh@chonnam.ac.kr](mailto:kdhh@chonnam.ac.kr)

### Calculations details for Tafel, C<sub>dl</sub>, ECSA, TOF, and number of active sites

For the intrinsic electrochemical activity enhancement assessment and to analyze the rate determination steps in HER and OER Tafel slop has been used. For these measurements the following Tafel equation was used<sup>1</sup>.

$$\eta = a + b \log |j|$$

where,  $\eta$ ,  $b$ , and  $j$  denotes the overpotential, Tafel slope, and current density respectively.

In general the double layer capacitance of the electrodes are used for the calculation of electrochemical active surface area. The double layer capacitance C<sub>dl</sub> has been calculated by slop of the linear regressions of anodic (i<sub>a</sub>) and cathodic (i<sub>c</sub>) current density with respect to scan rate in the non-faradic region. The double layer capacitance can be calculated from the following equation<sup>1</sup>.

$$i_a = \nu C_{dl}$$

Then, the appropriate electrochemical active surface area (ECSA) vales were calculated by the following formula.

$$ECSA = C_{dl} / C_s$$

In which, the C<sub>s</sub>-the specific capacitance (40 mF cm<sup>-2</sup> for 1.0 M KOH), C<sub>dl</sub>-calculated double layer capacitance.

The ECSA normalized polarization curves for both HER and OER activity has been calculated by the following formula<sup>1</sup>.

$$\text{Specific activity} = j / ECSA$$

Where  $j$ - is the observed current density <sup>2</sup>.

Turnover frequency (TOF) of the electrodes were calculated based on the previously reported method <sup>1, 3-5</sup>.

$$TOF = \frac{\text{Total Hydrogen Turnovers/cm}^2 \text{ of geometric area}}{\text{No. of Surface active sites /cm}^2 \text{ of geometric area}}$$

The prepared electrode consists of four different elements with different phases of the material. The exact elemental quantity and its ratios in the electrode are unknown. It is difficult to quantify the molar ratios of the elements in the electrode very precisely. Since, the ratio is an unknown, the reported articles suggest to calculate the number of electrons consumed by the surface of the electrodes to estimate the number of active sites. The total number of hydrogen turnovers assessed for the observed current density of the electrode by the following equation<sup>1, 5</sup>:

*Number of H<sub>2</sub>*

$$\begin{aligned} &= \left( j \frac{\text{mA}}{\text{cm}^2} \right) \left( \frac{1 \text{ C s}^{-1}}{1000 \text{ mA}} \right) \left( \frac{1 \text{ mol e}^-}{96485.3 \text{ C}} \right) \left( \frac{1 \text{ mol H}_2}{2 \text{ mol e}^-} \right) \left( \frac{6.022 \times 10^{23} \text{ H}_2 \text{ molecules}}{1 \text{ mol H}_2} \right) \\ &= 3.12 \times 10^{15} \frac{\text{H}_2/\text{s}}{\text{cm}^2} \text{ per } \frac{\text{mA}}{\text{cm}^2} \end{aligned}$$

The total number of oxygen turnovers of the electrodes was estimated for the perceived current density of the electrodes using the following equation<sup>1, 5</sup>:

*Number of O<sub>2</sub>*

$$\begin{aligned} &= \left( j \frac{\text{mA}}{\text{cm}^2} \right) \left( \frac{1 \text{ C s}^{-1}}{1000 \text{ mA}} \right) \left( \frac{1 \text{ mol e}^-}{96485.3 \text{ C}} \right) \left( \frac{1 \text{ mol O}_2}{4 \text{ mol e}^-} \right) \left( \frac{6.022 \times 10^{23} \text{ O}_2 \text{ molecules}}{1 \text{ mol O}_2} \right) = \\ &1.56 \times 10^{15} \frac{\text{O}_2/\text{s}}{\text{cm}^2} \text{ per } \frac{\text{mA}}{\text{cm}^2} \end{aligned}$$

## Calculation of Surface-Active Sites

The electrons consumed by the electrode surface is calculated by using reduction peak are integration (Q) with the following expression<sup>1, 4</sup>:

$$Q = \frac{\int I dV}{v}$$

where  $Q$  the quantified charge carriers available over the surface of the electrodes, which is associated with the area of the reduction peak respect to scan rate over the defined potential window. For this present work, it is assumed that the surface redox reactions are single electron transfer reactions (Fe, Ni are considered as an active sites with Mo is playing a supporting role). From the quantified charge carriers, further the number of surface-active sites ( $N_A$ ) was calculated as follows

$$N = \frac{Q}{q}$$

Where,  $q = 1.602 \times 10^{-19} \text{ C}^1$ .

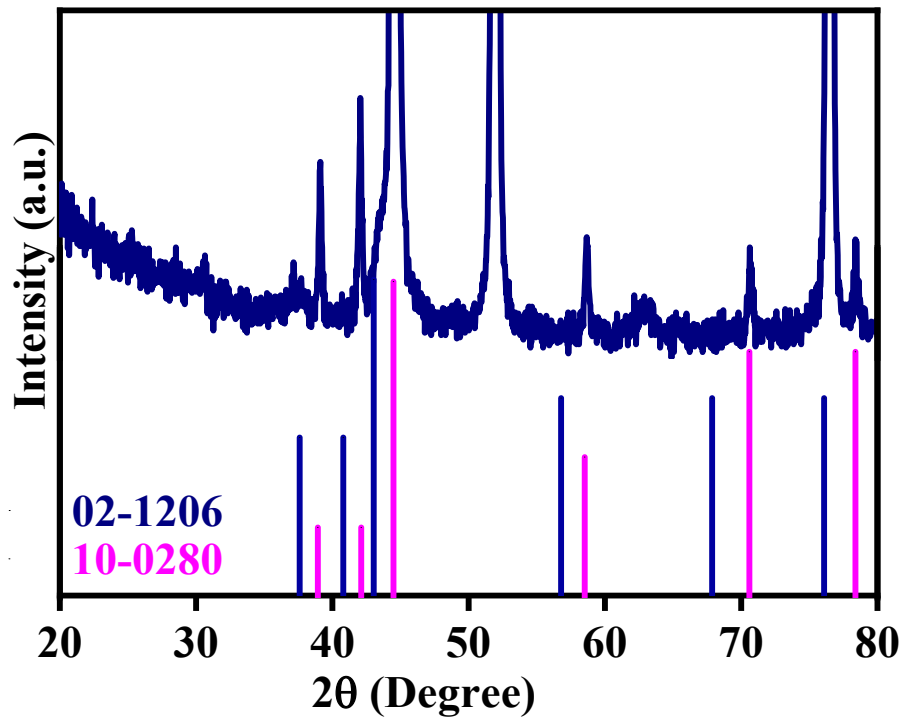

Figure S1-XRD Analysis of in-situ grown iron nitride on Ni Foam

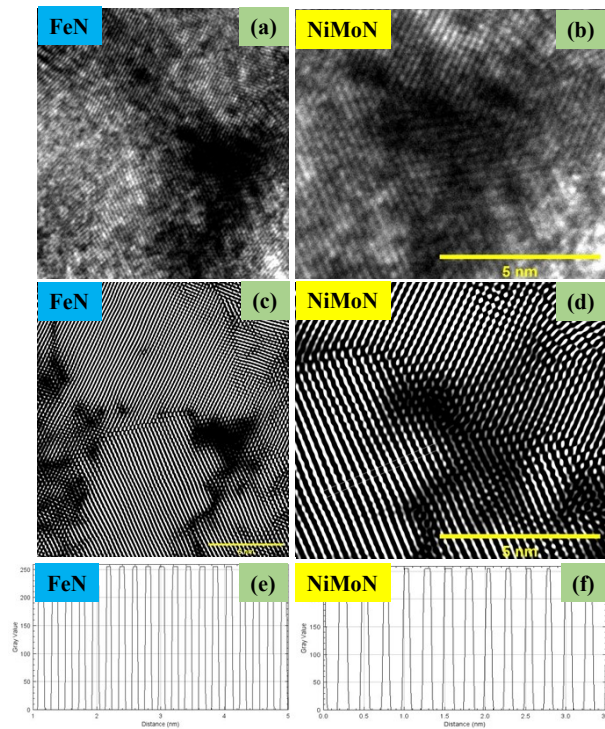

Figure S2 HRTEM analysis of the sample (a,c,e) related to Iron nitride (b,d,f) corresponding to the NiMoN Phases from the 1FeNiMoN sample.

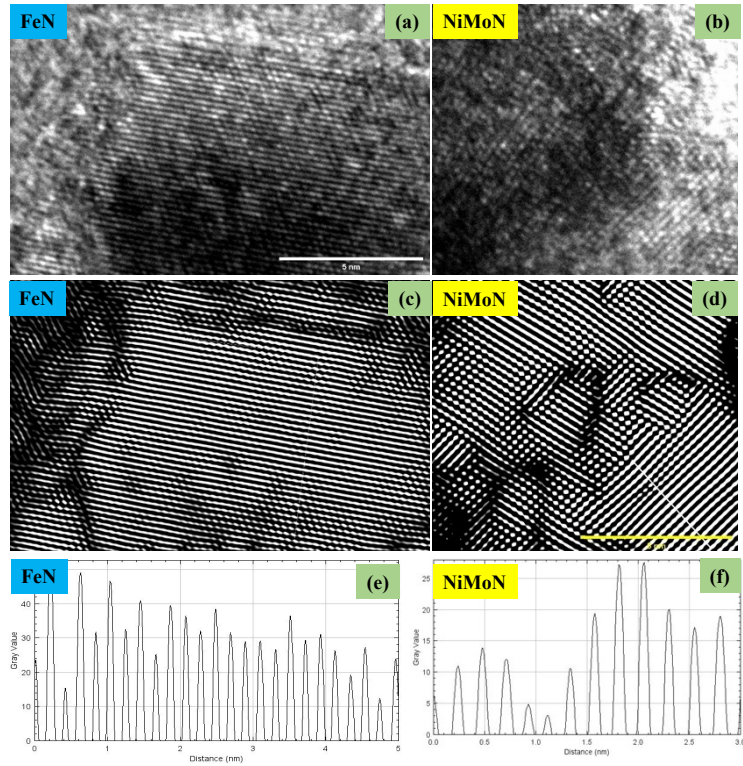

Figure S3 HRTEM analysis of the sample (a,c,e) related to Iron nitride (b,d,f) corresponding to the NiMoN Phases from the 3FeNiMoN sample.

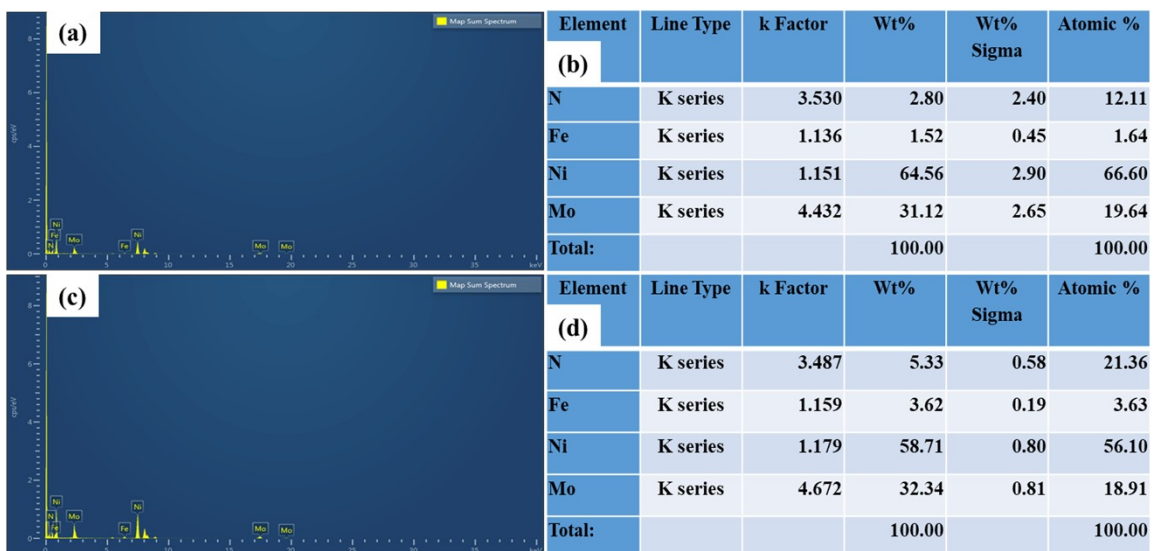

Figure S4 EDS Analysis (a-b) 1FeNiMoN, (c-d) 3FeNiMoN samples of the electrodes

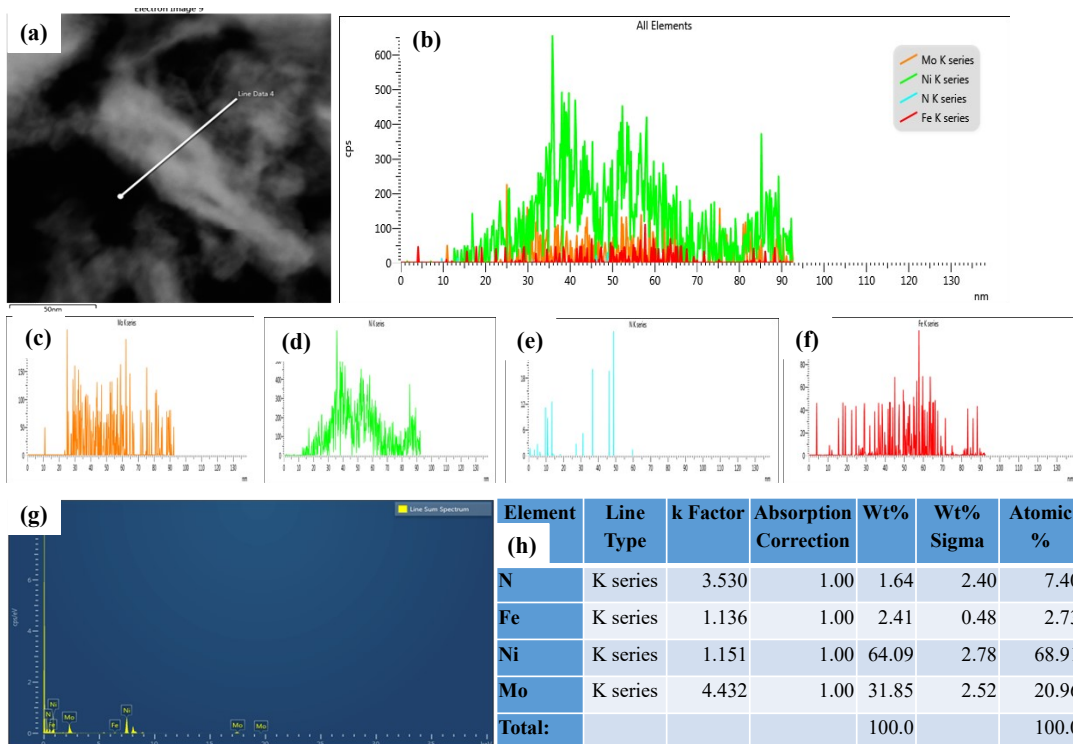

Figure S5 EDS line Profile and quantification of the elements in the 1FeNiMoN sample

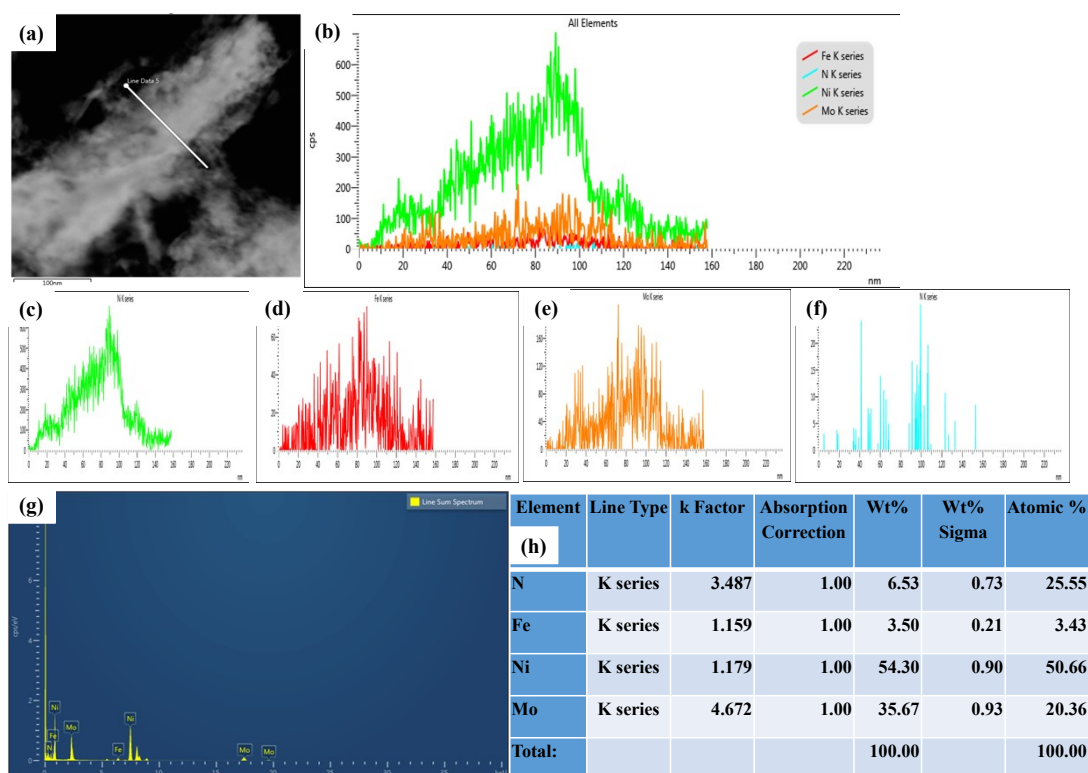

Figure S6 EDS line Profile and quantification of the elements in the 3FeNiMoN sample

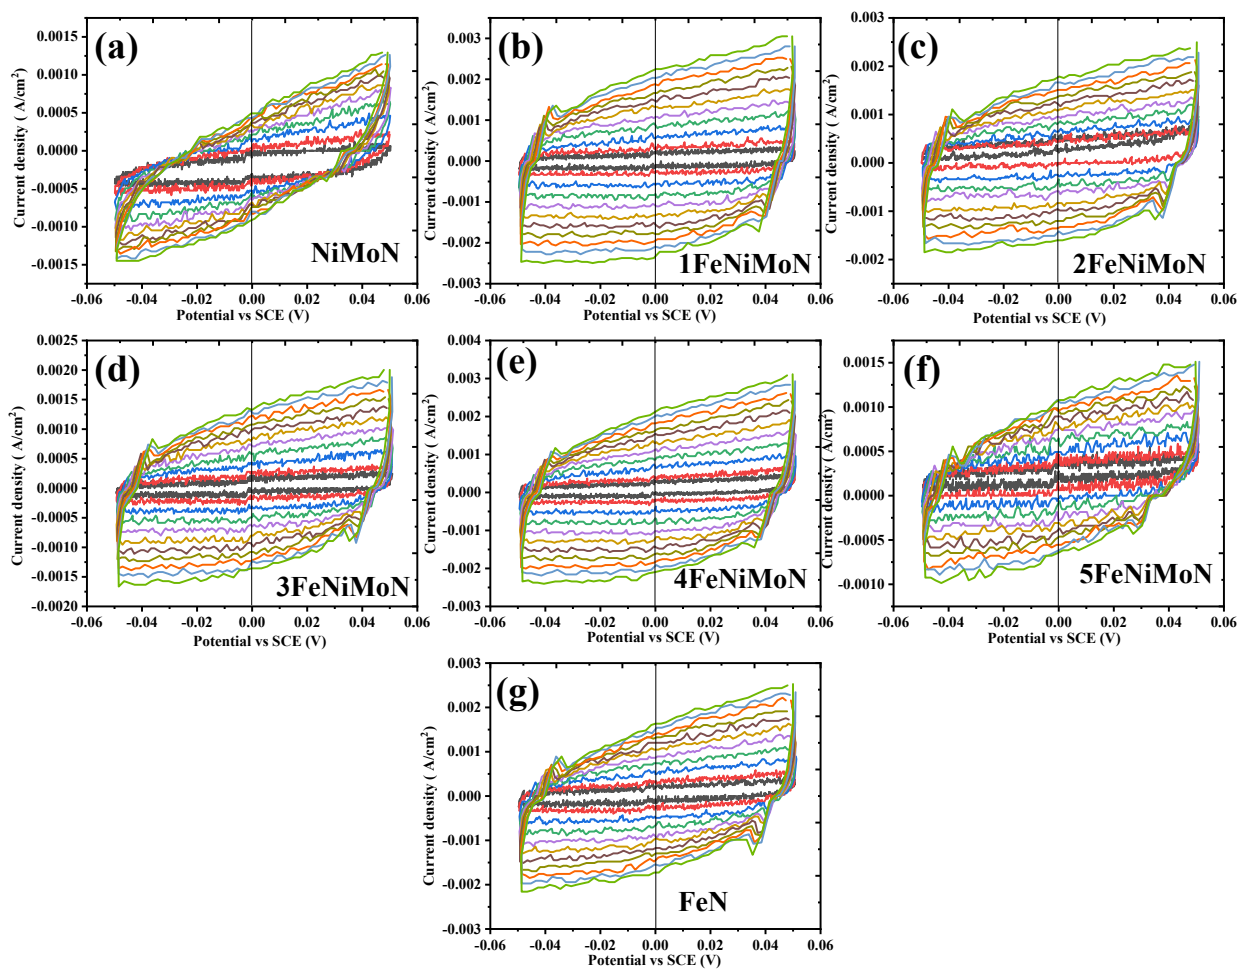

Figure S7. CV measurement of the samples with different scan rate in the non-faradiac region for the OER analysis



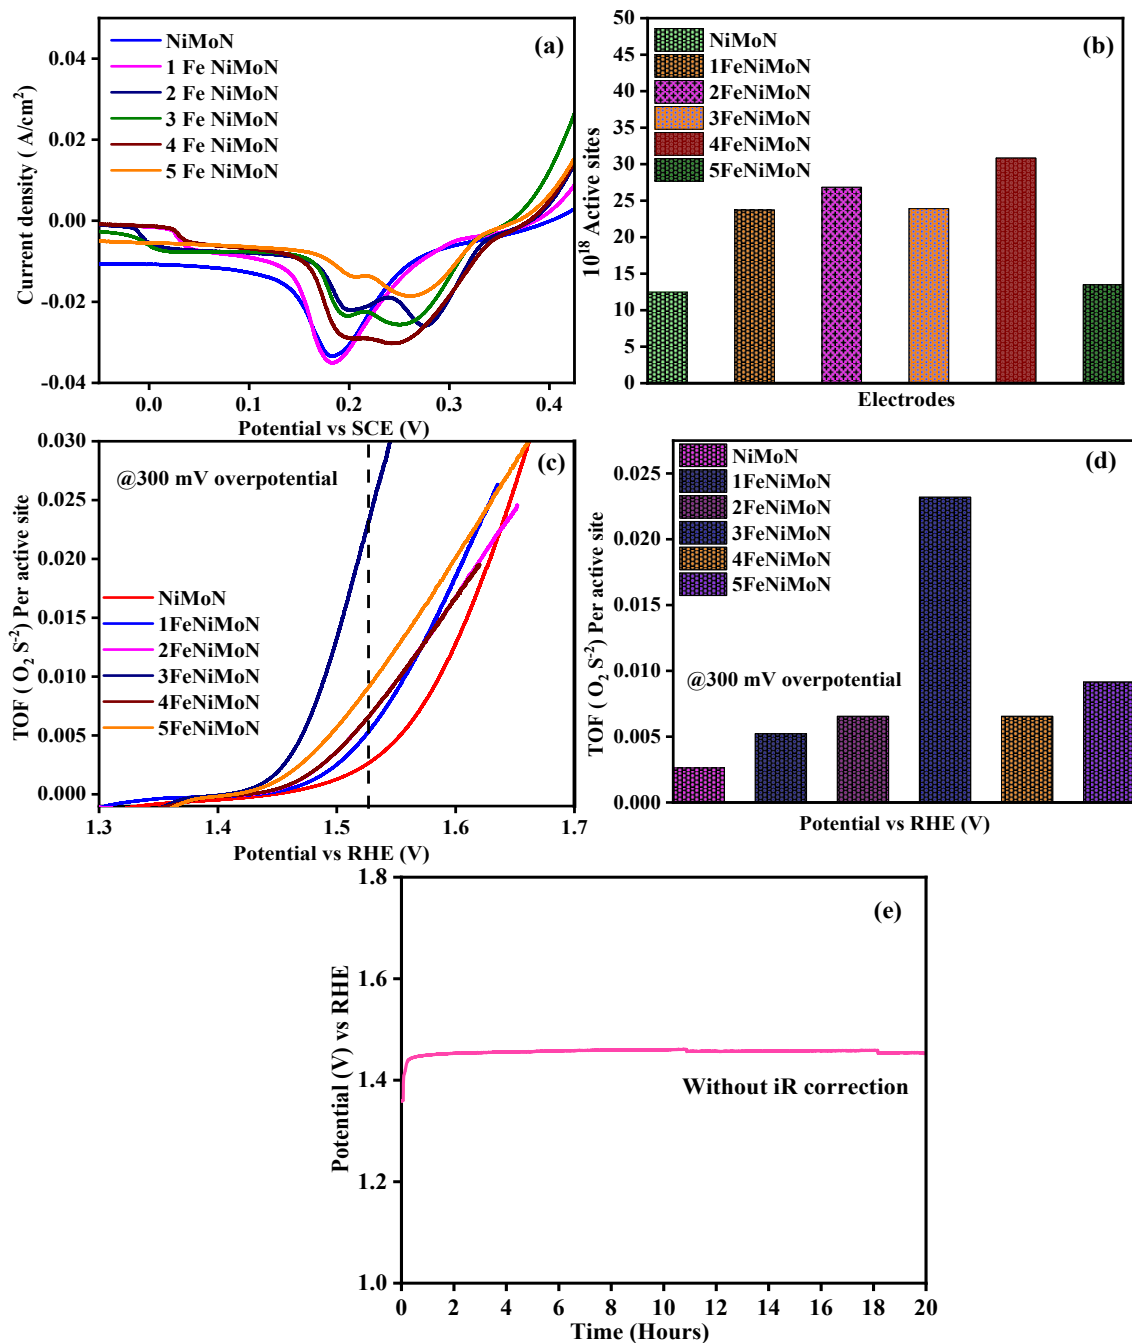

Figure S8. (a) Reduction area integration for the calculation of the number of active sites, (b) calculated number of active sites of the electrodes, (c) Measured TOF of the electrodes for the OER analysis, (d) Comparison of calculated TOF value at 300 mV overpotential for the prepared electrodes, (e) OER stability analysis without iR correction.

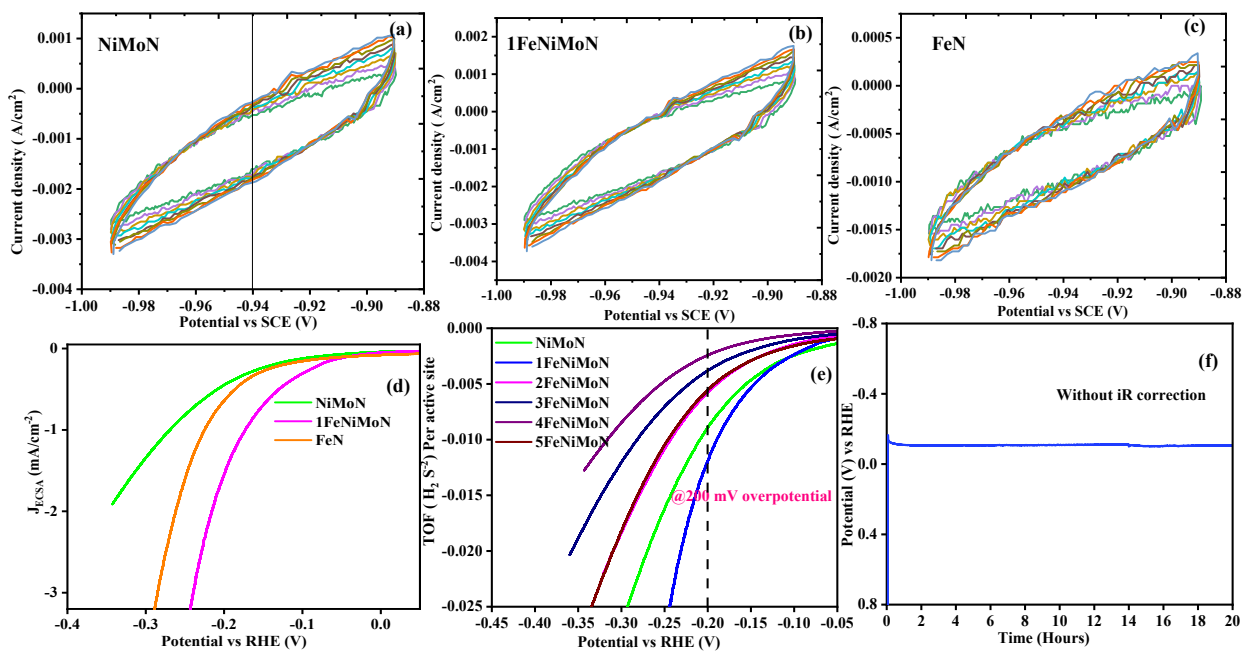

Figure S9. (a-c) CV measurement with different scan rate in the non-faradic region for the calculation of  $C_{dl}$  of the HER region (d) ECSA normalised HER activity of the samples, and (e) Calculated TOF of the prepared electrodes, (f) HER stability analysis without iR correction.

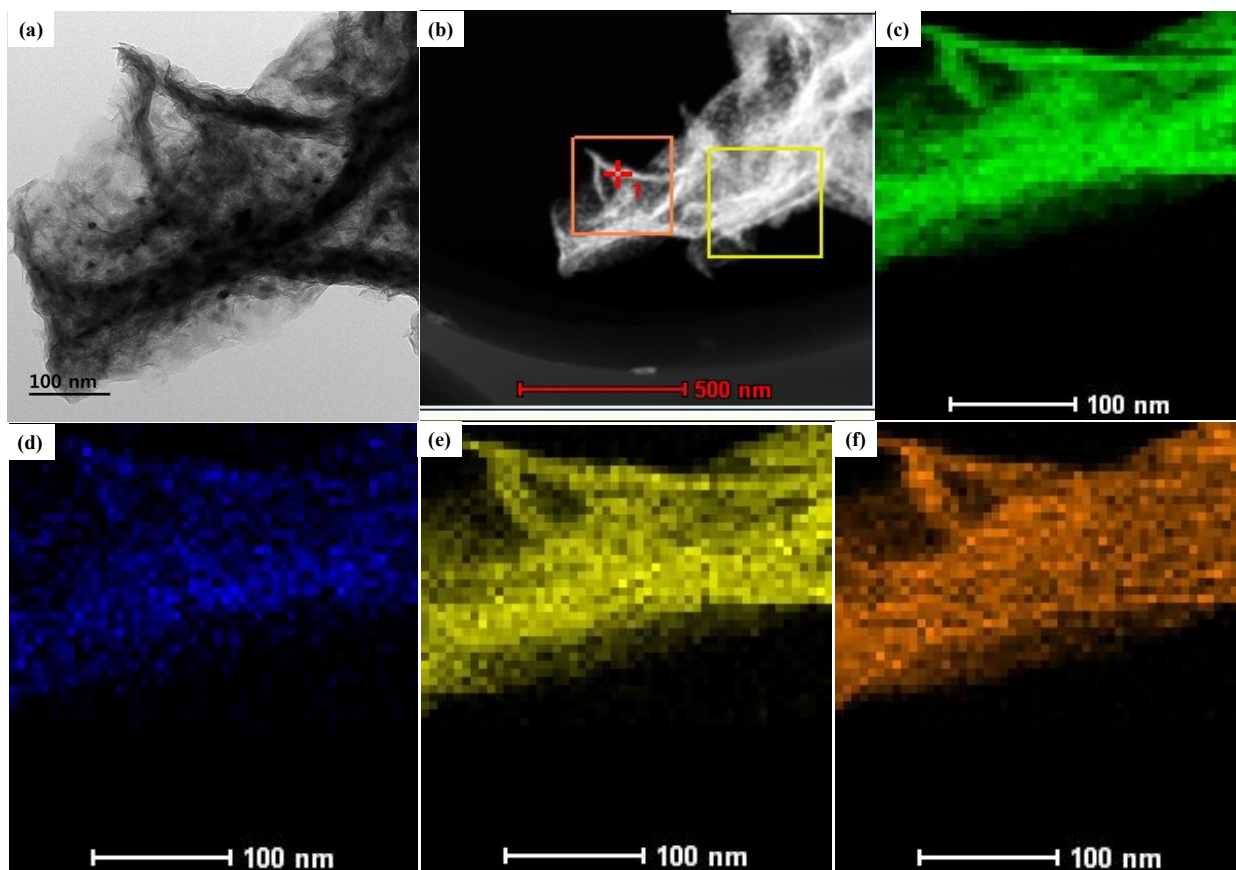

Figure S10. Post stability analysis of 3FeNiMoN (a) TEM Analysis (b) EDS Analysis (c) Ni, (d) Mo, (e) Fe, and (f) N elements

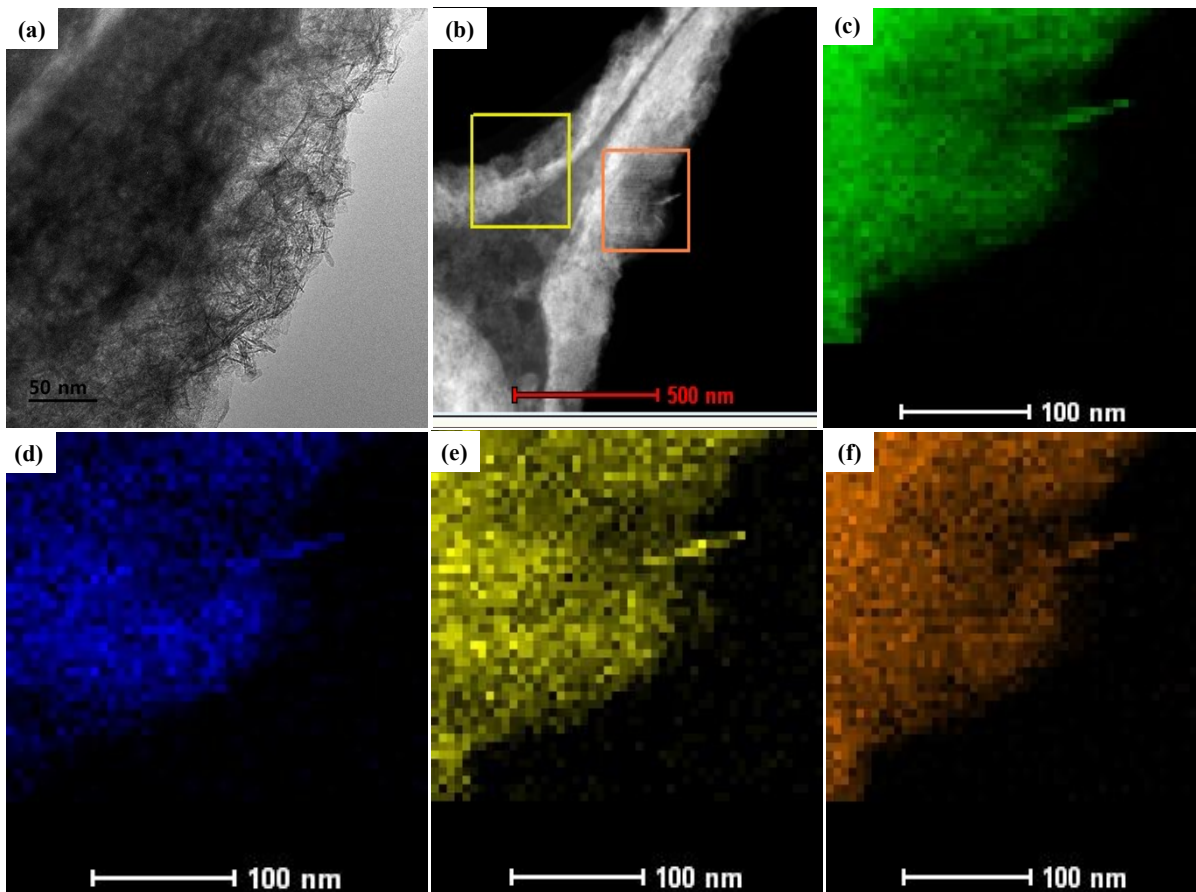

Figure S11. Post stability analysis of 1FeNiMoN (a) TEM Analysis (b) EDS Analysis (c) Ni, (d) Mo, (e) Fe, and (f) N elements

Table S1- Binding energy position of elements in the 1FeNiMoN and 3FeNiMoN

| Name     | Ni 2p<br>Binding energy (eV) |        |        |        |        |        | Mo 3d<br>Binding energy (eV) |        |        |        | N 1s<br>Binding energy (eV) |        |        | Fe2p<br>Binding energy (eV) |        |        |        |        |        |
|----------|------------------------------|--------|--------|--------|--------|--------|------------------------------|--------|--------|--------|-----------------------------|--------|--------|-----------------------------|--------|--------|--------|--------|--------|
|          | 1FeNiMoN                     | 852.58 | 854.48 | 859.98 | 871.08 | 873.08 | 878.98                       | 227.88 | 230.88 | 231.38 | 234.28                      | 393.68 | 396.18 | 398.08                      | 710.38 | 713.48 | 718.58 | 723.58 | 726.98 |
| 3FeNiMoN | 852.18                       | 855.48 | 861.18 | 869.58 | 873.38 | 879.88 | 228.88                       | 231.68 | 232.28 | 235.08 | 394.48                      | 396.68 | 398.58 | 710.38                      | 713.58 | 718.58 | 723.58 | 727.18 | 732.48 |

Table S2-ICP-OES Analysis of NiMoN, 1FeNiMoN, 3FeNiMoN samples

| Sample   | Element | Wavelength (nm) | Concentration (wt%) |
|----------|---------|-----------------|---------------------|
| NiMoN    | Ni      | 231.604         | 87.4                |
|          | Mo      | 202.031         | 11.5                |
| 1FeNiMoN | Fe      | 238.204         | 0.21                |
|          | Ni      | 231.604         | 100                 |
|          | Mo      | 202.031         | 5.68                |
| 3FeNiMoN | Fe      | 238.204         | 1.24                |
|          | Ni      | 231.604         | 92.6                |
|          | Mo      | 202.031         | 4.75                |

Table S3 BET measurements of the electrodes

| Sample Name | BET Specific surface area (m <sup>2</sup> g <sup>-1</sup> ) | Measured Pore volume (cc g <sup>-1</sup> ) | Measured Mean pore diameter (nm) |
|-------------|-------------------------------------------------------------|--------------------------------------------|----------------------------------|
| NiMoN       | 4.1253                                                      | 0.049218                                   | 47.723                           |
| 1FeNiMoN    | 2.4635                                                      | 0.023036                                   | 37.404                           |
| 3FeNiMoN    | 4.1508                                                      | 0.037858                                   | 36.482                           |

Table S4. The OER activity comparison of the optimized iron nitride/NiMoN with the literature.

| Catalyst Name                                                            | Electrolyte Solution details | Current density (mAcm <sup>-2</sup> ) | Onset/ Overpotential mV (cm <sup>-2</sup> ) | Tafel slope (mV dec <sup>-1</sup> ) | Ref       |
|--------------------------------------------------------------------------|------------------------------|---------------------------------------|---------------------------------------------|-------------------------------------|-----------|
| NiSe <sub>2</sub> -NPs/NiMoN-NRs                                         | 1.0 M KOH                    | 10                                    | 241                                         | 95.2                                | 6         |
| NiMoN-NF700                                                              | 1.0 M KOH                    | 50                                    | 290                                         | 54                                  | 7         |
| Co <sub>4</sub> N@CeO <sub>2</sub>                                       | 1.0 M KOH                    | 10, 100                               | 263,325                                     | 60.9                                | 8         |
| CeO <sub>2</sub> -Fe <sub>2</sub> N/NFC <sub>-2</sub>                    | 1.0 M KOH                    | 10                                    | 266                                         | 78.1                                | 9         |
| Fe <sub>7</sub> S <sub>8</sub> /Fe <sub>2</sub> N                        | 1.0 M KOH                    | 10                                    | 220                                         | 38.3                                | 10        |
| W <sub>2</sub> N <sub>3</sub> /Fe <sub>2</sub> N                         | 1.0 M KOH                    | 50, 100                               | 268.5, 285.9                                | 59.3 mV                             | 4         |
| NiO@CuCo <sub>2</sub> O <sub>4</sub> /MoNi                               | 1 M KOH                      | 50                                    | 313.0                                       | 69                                  | 11        |
| NiCo <sub>2</sub> O <sub>4</sub> /MoO <sub>2</sub> @ALD-NiO              | 1 M KOH                      | 100                                   |                                             | 57                                  | 12        |
| <a href="#">Co<sub>3</sub>N-Mo<sub>0.2</sub>@FeOOH/NF</a>                | 1 M KOH                      | 50, 100                               | 250, 260                                    | 48                                  | 13        |
| Mo <sub>2</sub> N/NiS-5:1                                                | 1.0 M KOH                    | 10, 30                                | 298, 391                                    | 181.85                              | 14        |
| Ir-Ni <sub>3</sub> N                                                     | 1 M KOH                      | 1, 10                                 | 248.16 , 273.30                             | 34.01                               | 15        |
| Co-Mo-N                                                                  | 1.0 M KOH                    | 10                                    | 288                                         | 95                                  | 16        |
| NNS-d/Ni <sub>2</sub> P@NC-NF                                            | 1 M KOH                      | 10                                    | 210                                         | 44.2                                | 17        |
| (Fe <sub>1-x</sub> Cu <sub>x</sub> ) <sub>4</sub> N-Cu <sub>2</sub> O/CF | 1 M KOH                      | 10                                    | 307                                         | 40                                  | 18        |
| FeNi(MoO <sub>4</sub> ) <sub>x</sub> @NF                                 | 1.0 M KOH                    | 10, 1000                              | 227, 351                                    | 47.51                               | 19        |
| CoFe-0.44                                                                | 1.0 M KOH                    | 10, 100                               | 229, 281                                    | 64.2                                | 20        |
| Fe <sub>2</sub> P/Ni <sub>3</sub> N                                      | 1 M KOH                      | 100                                   | 212                                         | 45.5                                | 21        |
| cRu-Ni <sub>3</sub> N                                                    | 1 M KOH                      | 20                                    | 226                                         | 40.4                                | 22        |
| NiMoN                                                                    | 1 M KOH                      | 10, 50, 100                           | 270, 333, 368                               | 92.26                               | This work |
| 3FeNiMoN                                                                 | 1 M KOH                      | 10, 50,100                            | 202, 230, 247                               | 41.72                               | This work |

Table. S5 Calculated double layer capacitance, Electrochemical active surface area, solution and charge transfer resistance values of the electrodes

| Sample Name | 2Cdl                  |      | ECSA   |      | R <sub>S</sub> (Ω) |       | R <sub>CT</sub> (Ω) |       |
|-------------|-----------------------|------|--------|------|--------------------|-------|---------------------|-------|
|             | (mF/cm <sup>2</sup> ) |      | OER    | HER  | OER                | HER   | OER                 | HER   |
|             | OER                   | HER  |        |      |                    |       |                     |       |
| NiMoN       | 6.12                  | 3.18 | 153    | 79.5 | 1.14               | 0.91  | 2.43                | 2.19  |
| 1FeNiMoN    | 21.73                 | 2.34 | 543.2  | 58.5 | 0.97               | 1.315 | 2.40                | 0.140 |
| 2FeNiMoN    | 15.82                 | -    | 395.5  |      | 0.87               | 0.88  | 1.34                | 2.23  |
| 3FeNiMoN    | 13.25                 | -    | 331.2  |      | 1.06               | 0.75  | 0.223               | 2.54  |
| 4FeNiMoN    | 20.60                 | -    | 315    |      | 1.05               | 1.1   | 0.83                | 2.04  |
| 5FeNiMoN    | 8.30                  | -    | 207.5  |      | 0.88               | 0.89  | 0.846               | 2.34  |
| FeN         | 15.39                 | 1.82 | 384.75 | 45.5 | 1.24               | 0.99  | 2.38                | 1.43  |

Table S6. Comparison on catalytic performance for the HER activity of the 1FeNiMoN with literature

| Catalyst Name                                               | Electrolyte details                              | Overpotential at details (cm <sup>-2</sup> ) | Current density | Tafel slope (mV dec <sup>-1</sup> ) | Ref |
|-------------------------------------------------------------|--------------------------------------------------|----------------------------------------------|-----------------|-------------------------------------|-----|
| NiMoN <sub>x</sub> /C                                       | 0.1 M HClO <sub>4</sub>                          | 78                                           | onset           | 35                                  | 23  |
| NiSe <sub>2</sub> -NPs/NiMoN-NRs                            | 1.0 M KOH                                        | 58 mV                                        | 10              | 68.7                                | 6   |
| Pt/Ni-Mo-N-O                                                | Base, acidic, neutral                            | 40.6, 89.5, 101.1                            | 100             | 30                                  | 24  |
| NF/Co <sub>4</sub> N @ CeO <sub>2</sub>                     | 1.0 M KOH                                        | 49                                           | 10              | 137.7                               | 8   |
| M-CoP/HPFs                                                  | 0.5 M H <sub>2</sub> SO <sub>4</sub> and 1 M KOH | 144 and 92                                   | 10              | 52, 71                              | 25  |
| W <sub>2</sub> N <sub>3</sub> /Fe <sub>2</sub> N            | 1.0 M KOH                                        | 85.2 and 187.2 mV                            | 10 and 50       | 56.4                                | 4   |
| NiCo <sub>2</sub> O <sub>4</sub> /MoO <sub>2</sub> @ALD-NiO | 1.0 M KOH                                        | 57 and 212                                   | 10 and 30       | 58                                  | 12  |
| Pt-Ni@NiMoN/NF                                              | 1 M KOH                                          | 7                                            | 10              | 22.9                                | 26  |

|                                                                             |                    |              |           |        |           |
|-----------------------------------------------------------------------------|--------------------|--------------|-----------|--------|-----------|
| Mo <sub>2</sub> N/NiS-5:1                                                   | 1.0 M KOH          | 254, 327     | 10,30     | 130.08 | 14        |
| Ir-Ni <sub>3</sub> N                                                        | 1 M KOH            | 7.1, 66.7    | 1, 10     | 66.76  | 15        |
| Co-Mo-N                                                                     | 1.0 M KOH          | 82           | 10        | 121    | 16        |
| NNS-d/Ni <sub>2</sub> P@NC-NF                                               | 1 M KOH            | 47           | 10        | 54.5   | 17        |
| (Fe <sub>1-x</sub> Cu <sub>x</sub> ) <sub>4</sub> N-Cu <sub>2</sub> O/CF    | 1 M KOH            | 30           | 10        | 61     | 18        |
| <a href="#">c-CNT-0.68@TpBpy-Ru</a>                                         | 1.0 M KOH solution | 112          | 10        | -      | 27        |
| Ni <sub>3</sub> N (Fe <sub>2-2x</sub> Co <sub>2x</sub> P/Ni <sub>3</sub> N) | 1 M KOH            | 113          | 100       | -      | 21        |
| NiMoN                                                                       | 1 M KOH            | 103,227, 293 | 10,50,100 | 174    | This work |
| 1FeNiMoN                                                                    | 1 M KOH            | 71, 161, 206 | 10,50,100 | 122    | This work |

Table S7. The overall water electrolysis performance of the 1FeNiMoN//3FeiMoN assembly and its comparison with the recent reports.

| Electrode details                                                                              | Electrolyte details | Cell Voltage (V) | Current density (cm <sup>-2</sup> ) | Stability details(hours) | Reference |
|------------------------------------------------------------------------------------------------|---------------------|------------------|-------------------------------------|--------------------------|-----------|
| NiSe <sub>2</sub> -NPs/NiMoN-NRs                                                               | 1.0 M KOH           | 1.51 V           | 10                                  | 50                       | 6         |
| NiMoN-NF700                                                                                    | 1.0 M KOH           | 1.49             | 10                                  | 48                       | 7         |
| Co <sub>4</sub> N@CeO <sub>2</sub>                                                             | 1.0 M KOH           | 1.56             | 100                                 |                          | 8         |
| W <sub>2</sub> N <sub>3</sub> -10/Fe <sub>2</sub> N                                            | 1.0 M KOH           | 1.54 and 1.68 V  | 10, 50                              | 200                      | 4         |
| NiO@CuCo <sub>2</sub> O <sub>4</sub> /MoNi                                                     | 1.0 M KOH           | 1.54, 1.71       | 10,50                               | 200                      | 11        |
| NiCo <sub>2</sub> O <sub>4</sub> /MoO <sub>2</sub> @ALD-NiO                                    | 1.0 M KOH           | 1.62             | 10                                  | 100                      | 12        |
| <a href="#">Co<sub>3</sub>N-Mo<sub>0.2</sub>/NF  Co<sub>3</sub>N-Mo<sub>0.2</sub>@FeOOH/NF</a> | 1.0 M KOH           | 1.62             | 50                                  | 12                       | 13        |
| Mo <sub>2</sub> N/NiS-5:1                                                                      | 1.0 M KOH           | 1.84             | 100                                 | 100                      | 14        |
| Co-Mo-N                                                                                        | 1.0 M KOH           | 1.59             | 10                                  | 16                       | 16        |
| NNS-d/Ni <sub>2</sub> P@NC-NF                                                                  | 1.0 M KOH           | 1.49             | 10                                  | 120                      | 17        |
| (Fe <sub>1-x</sub> Cu <sub>x</sub> ) <sub>4</sub> N-Cu <sub>2</sub> O/CF                       | 1.0 M KOH           | 1.57             | 10                                  | 80                       | 18        |
| Fe <sub>2</sub> P/Co <sub>2</sub> N                                                            | 1.0M KOH            | 1.561            | 100                                 | 120                      | 28        |
| Co <sub>2</sub> P/Co <sub>4</sub> N//NiFe-LDH                                                  | 1.0 M KOH           | 1.48             | 10                                  | 50                       | 29        |
| 1FeNiMoN//3FeiMoN                                                                              | 1 M KOH solution    | 1.49             | 10                                  | Multistep for 120 hours  | This work |



## References

1. V. Jayaraman, G. Jang and D.-H. Kim, *Applied Surface Science*, 2024, 159336.
2. N. Sinha and P. Roy, *Inorganic Chemistry*, 2022, **62**, 3349-3357.
3. D. J. Li, U. N. Maiti, J. Lim, D. S. Choi, W. J. Lee, Y. Oh, G. Y. Lee and S. O. Kim, *Nano letters*, 2014, **14**, 1228-1233.
4. T. Kavinkumar, H. Yang, A. T. Sivagurunathan, H. Jeong, J. W. Han and D. H. Kim, *Small*, 2023, DOI: <https://doi.org/10.1002/sml.202300963>, 2300963.
5. H. Liang, A. N. Gandi, D. H. Anjum, X. Wang, U. Schwingenschlögl and H. N. Alshareef, *Nano letters*, 2016, **16**, 7718-7725.
6. J. Wang, D. T. Tran, K. Chang, S. Prabhakaran, D. H. Kim, N. H. Kim and J. H. Lee, *Energy & Environmental Materials*, 2023, **6**, e12526.
7. B. Chang, J. Yang, Y. Shao, L. Zhang, W. Fan, B. Huang, Y. Wu and X. Hao, *ChemSusChem*, 2018, **11**, 3198-3207.
8. P. Zhou, G. Hai, G. Zhao, R. Li, X. Huang, Y. Lu and G. Wang, *Applied Catalysis B: Environmental*, 2023, **325**, 122364.
9. M. Wang, J. Ren, H. Wang, X. Wang and R. Wang, *Nanoscale*, 2023, **15**, 8217-8224.
10. S. Xie, J. Lin, S. Wang, D. Xie, P. Liu, G. Tan, M. Zhang, D. Ruan, C. Zhen and F. Cheng, *Journal of Power Sources*, 2020, **457**, 228038.
11. T. Kavinkumar, S. Seenivasan, A. T. Sivagurunathan and D.-H. Kim, *Journal of Materials Chemistry A*, 2021, **9**, 21750-21759.
12. T. Kavinkumar, S. Seenivasan, H. Jung, J. W. Han and D.-H. Kim, *Journal of Materials Chemistry A*, 2021, **9**, 21132-21141.
13. W. Huang, Y. Tong, D. Feng, Z. Guo, R. Ye and P. Chen, *ChemSusChem*, 2023, DOI: <https://doi.org/10.1002/cssc.202202078>, e202202078.
14. Y. Zang, S. Huang, B. Yang, G. Chen, X. Liu and N. Zhang, *Applied Surface Science*, 2023, **611**, 155656.
15. G. Liu, F. Hou, Y. Wang, X. Wang and B. Fang, *Applied Surface Science*, 2023, **637**, 157896.
16. J. Zhu, Q. Du, M. A. Khan, H. Zhao, J. Fang, D. Ye and J. Zhang, *Applied Surface Science*, 2023, **623**, 156989.
17. W.-Z. Chen, M. Zhang, L. Zhang, J. He, Z. Liu and Y.-Q. Wang, *Electrochimica Acta*, 2023, **441**, 141868.
18. M. Wang, X. Zheng, Y. Li, Z. Zou, Y. Ling and Q. Wang, *Chemical Engineering Journal*, 2023, **460**, 141854.
19. K. Dastafkan, S. Wang, C. Rong, Q. Meyer, Y. Li, Q. Zhang and C. Zhao, *Advanced Functional Materials*, 2022, **32**, 2107342.
20. S. F. Hung, Y. Y. Hsu, C. J. Chang, C. S. Hsu, N. T. Suen, T. S. Chan and H. M. Chen, *Advanced Energy Materials*, 2018, **8**, 1701686.

21. W. Ma, D. Li, L. Liao, H. Zhou, F. Zhang, X. Zhou, Y. Mo and F. Yu, *Small*, 2023, DOI: <https://doi.org/10.1002/sml.202207082>, 2207082.
22. J. Zhu, R. Lu, W. Shi, L. Gong, D. Chen, P. Wang, L. Chen, J. Wu, S. Mu and Y. Zhao, *Energy & Environmental Materials*, 2023, **6**, e12318.
23. W. F. Chen, K. Sasaki, C. Ma, A. I. Frenkel, N. Marinkovic, J. T. Muckerman, Y. Zhu and R. R. Adzic, *Angewandte Chemie International Edition*, 2012, **51**, 6131-6135.
24. W. Yu, Z. Chen, Y. Fu, W. Xiao, B. Dong, Y. Chai, Z. Wu and L. Wang, *Advanced Functional Materials*, 2023, **33**, 2210855.
25. Y. Pan, K. Sun, Y. Lin, X. Cao, Y. Cheng, S. Liu, L. Zeng, W.-C. Cheong, D. Zhao and K. Wu, *Nano energy*, 2019, **56**, 411-419.
26. H. Hu, Z. Zhang, Y. Zhang, T. Thomas, H. Du, K. Huang, J. P. Attfield and M. Yang, *Energy & Environmental Science*, 2023, **16**, 4584-4592.
27. X. Sun, Y. Hu, Y. Fu, J. Yang, D. Song, B. Li, W. Xu and N. Wang, *Small*, 2023, DOI: <https://doi.org/10.1002/sml.202305978>, 2305978.
28. X. Zhou, Y. Mo, F. Yu, L. Liao, X. Yong, F. Zhang, D. Li, Q. Zhou, T. Sheng and H. Zhou, *Advanced Functional Materials*, 2023, **33**, 2209465.
29. M. Qin, L. Chen, H. Zhang, M. Humayun, Y. Fu, X. Xu, X. Xue and C. Wang, *Chemical Engineering Journal*, 2023, **454**, 140230.
